# Supplementary material for: Effect of interventions based on educational technologies on the prevention of sexually transmitted infections in incarcerated women: protocol of a systematic review and meta-analysis
Source: HighWire-hosted journal article supplement (doi:10.1136/bmjopen-2020-043373), 2021-04-01
Supplement: bmjopen-2020-043373supp001_data_supplement.pdf [file bmjopen-2020-043373supp001_data_supplement.pdf]

## APPENDIX

### Search Strategy PubMed

("Women"[MeSH Terms] OR "Women"[All Fields] OR "Girl"[All Fields] OR "Woman"[All Fields] OR "Girls"[All Fields] OR "Female"[MeSH Terms] OR "Females"[All Fields] OR "Female"[All Fields] OR "Women's Health"[MeSH Terms] OR "Women's Health"[All Fields] OR "Womens Health"[All Fields] OR "Woman's Health"[All Fields]) AND ("Prisons"[MeSH Terms] OR "Prisons"[All Fields] OR "Prison"[All Fields] OR "Penitentiaries"[All Fields] OR "Penitentiary"[All Fields] OR "Prisoners"[MeSH Terms] OR "Prisoner"[All Fields] OR "Prisoners"[All Fields] OR "Incarceration"[All Fields] OR "Incarcerated"[All Fields]) AND ("Educational Technology"[MeSH Terms] OR "Educational Technology"[All Fields] OR "Educational Technologies"[All Fields] OR "Instructional Technology"[All Fields] OR "Instructional Technologies"[All Fields] OR "Health Education"[MeSH Terms] OR "Health Education"[All Fields] OR "Health Promotion"[MeSH Terms] OR "Health Promotion"[All Fields] OR "Promotion of Health"[All Fields] OR "Health Promotions"[All Fields] OR "Promotional Items"[All Fields] OR "Promotional Item"[All Fields] OR "Wellness Programs"[All Fields] OR "Wellness Program"[All Fields] OR "Health Campaigns"[All Fields] OR "Health Campaign"[All Fields]) AND ("Sexually Transmitted Diseases"[MeSH Terms] OR "Sexually Transmitted Diseases"[All Fields] OR "Sexually Transmitted Disease"[All Fields] OR "STIs"[All Fields] OR "STI"[All Fields] OR "Venereal Diseases"[All Fields] OR "Venereal Disease"[All Fields] OR "Sexually Transmitted Infections"[All Fields] OR "Sexually Transmitted Infection"[All Fields] OR "STDs"[All Fields] OR "Sex Education"[MeSH Terms] OR "Sex Education"[All Fields] OR "Gonorrhoea"[MeSH Terms] OR "Gonorrhoea"[All Fields] OR "Neisseria gonorrhoeae Infection"[All Fields] OR "Granuloma Inguinale"[MeSH Terms] OR "Granuloma Inguinale"[All Fields] OR "Granuloma Venereum"[All Fields] OR "Donovanosis"[All Fields] OR "Syphilis"[MeSH Terms] OR "Syphilis"[All Fields] OR "Great Pox"[All Fields] OR "Chancroid"[MeSH Terms] OR "Chancroid"[All Fields] OR "Chlamydia Infections"[MeSH Terms] OR "Chlamydia Infections"[All Fields] OR "Chlamydia Infection"[All Fields] OR "Chlamydia"[All Fields] OR "Lymphogranuloma Venereum"[MeSH Terms] OR "Lymphogranuloma Venereum"[All Fields] OR "Lymphogranuloma Inguinale"[All Fields] OR "Condylomata Acuminata"[MeSH Terms] OR "Condylomata Acuminata"[All Fields] OR "Venereal Warts"[All Fields] OR "Venereal Wart"[All Fields] OR "Genital Warts"[All Fields] OR "Genital Wart"[All Fields] OR "buschke lowenstein tumor"[MeSH Terms] OR "buschke lowenstein tumor"[All Fields] OR "buschke lowenstein tumor"[All Fields] OR "Giant Condyloma Acuminatum"[All Fields] OR "Giant Condyloma of Buschke and Lowenstein"[All Fields] OR "buschke lowenstein tumor"[All Fields] OR "buschke lowenstein tumor"[All Fields] OR "Giant Condyloma of Buschke and Lowenstein"[All Fields] OR "Herpes Genitalis"[MeSH Terms] OR "Herpes Genitalis"[All Fields] OR "Genital Herpes"[All Fields] OR "Herpes Simplex Virus

Genital Infection"[All Fields] OR "Genital Herpes Simplex"[All Fields] OR "HIV Infections"[MeSH Terms] OR "HIV Infections"[All Fields] OR "HIV Infection"[All Fields] OR "HTLV III LAV Infections"[All Fields] OR "HTLV III LAV Infection"[All Fields] OR "HTLV III Infections"[All Fields] OR "HTLV III Infection"[All Fields] OR "HIV Coinfection"[All Fields] OR "HIV Coinfections"[All Fields] OR "Acquired Immunodeficiency Syndrome"[MeSH Terms] OR "Acquired Immunodeficiency Syndrome"[All Fields] OR "Acquired Immune Deficiency Syndrome"[All Fields] OR "Acquired Immuno Deficiency Syndrome"[All Fields] OR "Acquired Immunodeficiency Syndromes"[All Fields] OR "AIDS"[All Fields] OR "HIV"[MeSH Terms] OR "HIV"[All Fields] OR "Human Immunodeficiency Virus"[All Fields] OR "Human Immunodeficiency Viruses"[All Fields] OR "Human T Cell Lymphotropic Virus Type III"[All Fields] OR "Human T Cell Leukemia Virus Type III"[All Fields] OR "LAV-HTLV-III"[All Fields] OR "Lymphadenopathy Associated Virus"[All Fields] OR "Human T Lymphotropic Virus Type III"[All Fields] OR "Acquired Immune Deficiency Syndrome Virus"[All Fields] OR "Acquired Immunodeficiency Syndrome Virus"[All Fields] OR "HTLV-III"[All Fields] OR "Papillomavirus Infections"[MeSH Terms] OR "Papillomavirus Infections"[All Fields] OR "Papillomavirus Infection"[All Fields] OR "Human Papillomavirus Infection"[All Fields] OR "Human Papillomavirus Infections"[All Fields] OR "HPV Infection"[All Fields] OR "HPV Infections"[All Fields] OR "HPV"[All Fields] OR "Papillomaviridae"[MeSH Terms] OR "Papillomaviridae"[All Fields] OR "Human Papilloma Virus"[All Fields] OR "Human Papilloma Viruses"[All Fields] OR "Human Papillomavirus Viruses"[All Fields] OR "Human Papillomavirus Virus"[All Fields] OR "hepatitis, viral, human"[MeSH Terms] OR "Human Viral Hepatitides"[All Fields] OR "Human Viral Hepatitis"[All Fields] OR "Hepatitis B"[MeSH Terms] OR "Hepatitis B"[All Fields] OR "Hepatitis C"[MeSH Terms] OR "Hepatitis C"[All Fields] OR "Hepatitis D"[MeSH Terms] OR "Hepatitis D"[All Fields] OR "Delta Hepatitis"[All Fields] OR "Delta Infection"[All Fields] OR "Delta Superinfections"[All Fields] OR "Delta Superinfection"[All Fields] OR "Amazon Black Fever"[All Fields] OR "Labrea Disease"[All Fields])
